# Supplementary material for: Retinal Vein Occlusion after COVID-19 Vaccination—A Review
Source: MDPI journal article supplement (doi:10.3390/vaccines11081281), 2023-07-26
Supplement: s1 [file s1]

## **Retinal vein occlusion after COVID-19 vaccination – A review**

Ho-Man Leung <sup>1</sup>, Sunny Chi-Lik Au <sup>2</sup>

1. Hospital Authority, Hong Kong

2. Department of Ophthalmology, Tung Wah Eastern Hospital, Hong Kong

### **SUPPLEMENTARY FILE**

**Containing 2 tables with references**

Table S1 – Patient’s demographics, clinical presentation, vaccination record and ophthalmic findings

| Paper                              | Age | Gender | Country | Complaint                                                | Laterality | BCVA of affected eye | Interval between last dose and symptom onset | Dose | Vaccine     | Fundal abnormalities of the affected eye                                                                                                                                                   | OCT abnormalities of the affected eye                                                     | OCTA abnormalities of the affected eye                                                         | FA abnormalities of the affected eye                                                                                               |
|------------------------------------|-----|--------|---------|----------------------------------------------------------|------------|----------------------|----------------------------------------------|------|-------------|--------------------------------------------------------------------------------------------------------------------------------------------------------------------------------------------|-------------------------------------------------------------------------------------------|------------------------------------------------------------------------------------------------|------------------------------------------------------------------------------------------------------------------------------------|
| <b>Ruiz OA et al [1]</b>           | 51  | F      | Spanish | Blurry vision                                            | LE         | 8/10                 | 12 days                                      | 2nd  | Moderna     | optic disc swelling, diffuse venous tortuosity, retinal whitening along superior temporal arterial branch, widespread dot and blot haemorrhage and peripapillary flame-shaped haemorrhages | retinal edema with disorganization of retinal inner layers (DRIL) within the macula       | unknown                                                                                        | occlusion in the superior temporal branch of the retinal artery and a central retinal vein occlusion without cystoid macular edema |
| <b>Parakh S et al [2]</b>          | 31  | M      | India   | Vision diminution                                        | LE         | 6/9                  | 7 days                                       | 1st  | AstraZeneca | dilated tortuous veins, superficial and deep intraretinal haemorrhages in all four quadrants with macular edema, disc hyperemia and few cotton-wool spots                                  | CME and neurosensory detachment, central macular thickness of 485 µm                      | Flow void areas with reduction in vessel density in the superficial capillary plexus           | unknown                                                                                                                            |
| <b>Nangia P et al [3]</b>          | 13  | M      | India   | Vision diminution                                        | LE         | 6/7.5                | 15 days                                      | 1st  | Corbevax    | blurred disc margin, dilated and tortuous retinal vessels, and scattered flame-shaped hemorrhages in all quadrants                                                                         | unknown                                                                                   | unknown                                                                                        | delayed venous filling in early phase and blocked fluorescence corresponding to areas of haemorrhage                               |
| <b>Fernández-Vigo JI et al [4]</b> | 69  | F      | Spain   | Asymptomatic - Incidental finding of BRVO on routine F/U | LE         | 20/20                | 10 days                                      | 1st  | AstraZeneca | BRVO changes                                                                                                                                                                               | no macula edema                                                                           | non-perfused are next to vein occlusion                                                        |                                                                                                                                    |
|                                    |     |        |         | Sudden visual loss with central scotoma                  | RE         | 20/100               | 30 days                                      | 2nd  | AstraZeneca | multiple haemorrhages seen                                                                                                                                                                 | cystoid maculae edema, retinal neurosensory detachment and outer retina hyperreflectivity | unremarkable (no retinal neovascularisation or remarkable non-perfused regions) at 2 month F/U | unknown                                                                                                                            |

| <b>Chen Y [5]</b>               | 72  | M      | Taiwan             | Sudden visual loss                | RE         | hand motion only     | 10 days                                      | 2nd             | BNT                | extensive flame-shaped haemorrhages, attenuated retinal arteries and macula whitening                                                                              | hyperreflectivity of inner retinal layers, loss of retinal structure, subretinal fluid accumulation around macula                                                                    | unknown                                                                | delayed perfusion and extensive non-perfused area, leaking vessels present in the periphery and the disc                                              |
|---------------------------------|-----|--------|--------------------|-----------------------------------|------------|----------------------|----------------------------------------------|-----------------|--------------------|--------------------------------------------------------------------------------------------------------------------------------------------------------------------|--------------------------------------------------------------------------------------------------------------------------------------------------------------------------------------|------------------------------------------------------------------------|-------------------------------------------------------------------------------------------------------------------------------------------------------|
| <b>Karageorgiou G et al [6]</b> | 60  | M      | Greece (Caucasian) | Sudden painless visual loss       | RE         | 20/20                | 7 days                                       | unknown         | Vaxceria (ChAdOx1) | disc swelling, peripapillary intraretinal hemorrhages, dilated tortuous veins, and intraretinal dot-blot, flame-shaped hemorrhages in the upper temporal quadrant. | CME, intraretinal hyperreflectivity, intraretinal CME                                                                                                                                | unknown                                                                | localised hypofluorescence with no late leakage                                                                                                       |
| <b>Takacs A et al [7]</b>       | 35  | M      | Hungary            | 1-week onset visual loss          | RE         | 0.5                  | 14 days                                      | 1 <sup>st</sup> | mRNA vaccine       | haemorrhagic CRVO with papilloedema                                                                                                                                | cystoid maculae edema, elevated retinal nerve fibre layer (especially superior and inferior parts)                                                                                   | Unknown                                                                | unknown                                                                                                                                               |
| <b>Sodhi PK et al [8]</b>       | 43  | M      | India              | sudden painless vision diminution | LE         | 20/630               | 3 days                                       | 1st             | Covishield         | optic disc edema, dilated tortuous veins, dot-blot and flame-shaped haemorrhages across the fundus, and blunted foveal reflex                                      | inner retinal layer disorganisation, disruption of the inner segment-outer segment junction, distorted foveal contour with large cystic spaces, central foveal thickness 854 $\mu$ m | enlarged distorted foveal avascular zone, capillary non-perfusion seen | delayed venous filling, blocked fluorescence from retinal haemorrhages, capillary non-perfusion areas in the peripheral fundus, no neovascularisation |
| Paper                           | Age | Gender | Country            | Complaint                         | Laterality | BCVA of affected eye | Interval between last dose and symptom onset | Dose            | Vaccine            | Fundal abnormalities of the affected eye                                                                                                                           | OCT abnormalities of the affected eye                                                                                                                                                | OCTA abnormalities of the affected eye                                 | FA abnormalities of the affected eye                                                                                                                  |
| <b>Tanaka H et al [9]</b>       | 50  | F      | Japan              | vision loss                       | RE         | 20/25                | 3 days                                       | 1st             | BNT                | flame-shaped haemorrhages around the temporal superior retinal vein and macular edema                                                                              | flame-shaped haemorrhages around the temporal superior retinal vein and macular edema                                                                                                | no avascular area found                                                | unknown                                                                                                                                               |
|                                 | 56  | F      | Japan              | visual loss                       | RE         | 13/20                | 3 days                                       | 1st             | BNT                | flame-shaped haemorrhages around the                                                                                                                               | flame-shaped haemorrhages around the                                                                                                                                                 | no avascular area found                                                | unknown                                                                                                                                               |

|                               |    |   |        |                                                   |    |                            |         |     |                        |                                                                                                                                                                                       |                                                                                                                                         |         |                                                                                                                                                     |
|-------------------------------|----|---|--------|---------------------------------------------------|----|----------------------------|---------|-----|------------------------|---------------------------------------------------------------------------------------------------------------------------------------------------------------------------------------|-----------------------------------------------------------------------------------------------------------------------------------------|---------|-----------------------------------------------------------------------------------------------------------------------------------------------------|
|                               |    |   |        |                                                   |    |                            |         |     |                        | temporal inferior retinal vein and macular edema                                                                                                                                      | temporal inferior retinal vein and macular edema                                                                                        |         |                                                                                                                                                     |
| <b>Romano D et al [10]</b>    | 54 | F | Italy  | painless visual loss                              | RE | 20/400                     | 2 days  | 2nd | AstraZeneca            | disc swelling, retinal haemorrhages in all quadrants, dilated and tortuous retinal veins and altered macular reflex                                                                   | diffuse macular edema, foveal subretinal fluid                                                                                          | Unknown | delayed arteriovenous transit time, diffuse ischaemia of peripheral retina, retinal haemorrhage, staining of venous wall                            |
| <b>Majumder PD et al [11]</b> | 28 | M | India  | blurred vision                                    | RE | 2/60                       | 25 days | 3rd | AstraZeneca/Covishield | disc swelling, dilated and tortuous retinal vessels, flame-shaped and dot-blot haemorrhages, cotton wool spots around posterior pole                                                  | macular edema, subretinal fluid, foveal thickness: 823 $\mu$ m                                                                          | unknown | early phase: hypofluorescence, delayed venous filling (AV transit time: 42 second), blocked fluorescence corresponding to the areas of haemorrhages |
| <b>Priluck AZ et al [12]</b>  | 57 | F | USA    | flashes and floaters                              | LE | 20/20 both OD, OS          | 3 weeks | 2nd | Moderna                | superotemporal scattered intraretinal haemorrhages along superior arcade, no macular edema, AV nicking, marked venous tortuosity                                                      | unknown                                                                                                                                 | unknown | unknown                                                                                                                                             |
| <b>Sugihara K et al [13]</b>  | 38 | M | Japan  | visual diminution                                 | LE | 0.9 with myopic correction | 2 days  | 2nd | BNT                    | retinal haemorrhage and cotton-wool spots (superotemporal region of posterior pole)                                                                                                   | subfoveal fluid accumulation, thickened retina in the superior macular region (central foveal thickness 373 $\mu$ m) in superior macula | unknown | vascular staining and mild macular leakage                                                                                                          |
| <b>Pur DR et al [14]</b>      | 34 | M | Canada | blurred vision (inferior visual field), photopsia | RE | OU 20/20                   | 2 days  | 1st | BNT                    | superior nasal BRVO (venous dilatation and tortuosity, multiple retinal haemorrhages, cotton wool spots), intraretinal hemoarrhages in the superior retina extending to the periphery | unknown                                                                                                                                 | unknown | delayed venous filling + late staining of affected vessels                                                                                          |

|                             |    |   |           |                    |         |       |          |     |             |         |         |         |         |
|-----------------------------|----|---|-----------|--------------------|---------|-------|----------|-----|-------------|---------|---------|---------|---------|
| <b>Peters MC et al [15]</b> | 71 | M | Australia | visual disturbance | unknown | 6/60  | 2 days   | 1st | AstraZeneca | unknown | unknown | unknown | unknown |
|                             | 58 | M | Australia | visual disturbance | unknown | 6/18  | 3 days   | 1st | AstraZeneca | unknown | unknown | unknown | unknown |
|                             | 73 | F | Australia | visual disturbance | unknown | 6/19  | 3 days   | 1st | AstraZeneca | unknown | unknown | unknown | unknown |
|                             | 47 | F | Australia | visual disturbance | unknown | 6/9.6 | 5 days   | 1st | Pfizer      | unknown | unknown | unknown | unknown |
|                             | 36 | M | Australia | visual disturbance | unknown | 6/9   | 1-3 days | 2nd | Pfizer      | unknown | unknown | unknown | unknown |

| Paper                     | Age | Gender | Country         | Complaint               | Laterality | BCVA of affected eye | Interval between last dose and symptom onset | Dose | Vaccine | Fundal abnormalities of the affected eye                                                                                                                                                                                                                                                                                                                                                              | OCT abnormalities of the affected eye                                                                                               | OCTA abnormalities of the affected eye | FA abnormalities of the affected eye                                                                           |
|---------------------------|-----|--------|-----------------|-------------------------|------------|----------------------|----------------------------------------------|------|---------|-------------------------------------------------------------------------------------------------------------------------------------------------------------------------------------------------------------------------------------------------------------------------------------------------------------------------------------------------------------------------------------------------------|-------------------------------------------------------------------------------------------------------------------------------------|----------------------------------------|----------------------------------------------------------------------------------------------------------------|
| <b>Lee S et al [16]</b>   | 34  | M      | (Caucasian)     | blurred vision          | LE         | counting finger      | 10-12 days                                   | 2nd  | Pfizer  | dilated and tortuous retinal veins, some scattered blot haemorrhages in all quadrants; retinal whitening with a cherry red spot, disc edema looks like NAION (rotation of the edema around the nerve and the progressive edema without CRVO-related progression of the macular edema or blot haemorrhages; superior pole of optic nerve undergoes atrophy after edema resolution also suggests NAION) | exudative macular detachment, mildly thickened retina, no gross cystoid macular edema (baseline RNFL 93 $\mu$ m OD, 153 $\mu$ m OS) | unknown                                | delayed central retinal vein filling, delayed arterial filling (especially distant branches), blot haemorrhage |
| <b>Shah PP et al [17]</b> | 27  | F      | USA (Caucasian) | floaters and wavy lines | LE         | OU 20/20             | 10 days                                      | 1st  | BNT     | peripapillary vessel obscuration, NFL haemorrhage, few dot-and -blot haemorrhage near the macula, tortuous retinal vessel                                                                                                                                                                                                                                                                             | RNFL and macula thickening without subretinal fluid                                                                                 | unknown                                | normal AV transit time, no haemorrhage or leakage                                                              |

|                        |    |   |       |                          |    |          |         |     |            |                                                                                                                                              |                                                                       |                         |                  |
|------------------------|----|---|-------|--------------------------|----|----------|---------|-----|------------|----------------------------------------------------------------------------------------------------------------------------------------------|-----------------------------------------------------------------------|-------------------------|------------------|
|                        |    |   |       | blurred vision           | LE | OU 20/20 | 26 days | 2nd | BNT        | worsened haemorrhages and maculae edema                                                                                                      | new subretinal fluid affecting the fovea and nasal intraretinal fluid | unknown                 | unknown          |
| Sonawane NJ et al [18] | 50 | M | India | visual diminution        | RE | 6/60     | 4 days  | 2nd | Covishield | edematous disc, dilated and tortuous veins, diffuse retinal haemorrhages, macular edema (LE: mild proliferative diabetic retinopathy changes | CME, central foveal thickness: 571 µm                                 | unknown                 | unknown          |
|                        | 43 | F | India | sudden visual diminution | RE | 5/60     | 3 days  | 2nd | Covishield | hyperaemic and edematous disc, tortuous veins, and intraretinal hemorrhages in all quadrants                                                 | no CME                                                                | unknown                 | patient rejected |
| Tanaka H et al [19]    | 71 | F | Japan | visual loss              | LE | 20/30    | 1 day   | 2nd | BNT        | superior temporal BRVO and secondary macular edema                                                                                           | superior temporal BRVO and secondary macular edema                    | no avascular area found | unknown          |
|                        | 74 | M | Japan | visual loss              | RE | 20/25    | 1 day   | 1st | BNT        | superior temporal BRVO with secondary macular edema                                                                                          | superior temporal BRVO with secondary macular edema                   | no avascular area found | unknown          |

| Paper              | Age | Gender | Country | Complaint             | Laterality | BCVA of affected eye | Interval between last dose and symptom onset | Dose | Vaccine     | Fundal abnormalities of the affected eye | OCT abnormalities of the affected eye | OCTA abnormalities of the affected eye | FA abnormalities of the affected eye |
|--------------------|-----|--------|---------|-----------------------|------------|----------------------|----------------------------------------------|------|-------------|------------------------------------------|---------------------------------------|----------------------------------------|--------------------------------------|
| Park HS et al [20] | 68  | F      | Korea   | reduced visual acuity | LE         | hand motion          | 1 day                                        | 1st  | AstraZeneca | Done, but not available from text        | Done, but not available from text     | unknown                                | Done, but not available from text    |
|                    | 76  | M      | Korea   | reduced visual acuity | LE         | logMAR 0.8           | 3 days                                       | 1st  | Pfizer      | Done, but not available from text        | Done, but not available from text     | unknown                                | Done, but not available from text    |
|                    | 85  | F      | Korea   | reduced visual acuity | RE         | FC10                 | 1 day                                        | 2nd  | Pfizer      | Done, but not available from text        | Done, but not available from text     | unknown                                | Done, but not available from text    |
|                    | 59  | M      | Korea   | reduced visual acuity | LE         | logMAR 0.8           | 2 days                                       | 1st  | AstraZeneca | Done, but not available from text        | Done, but not available from text     | unknown                                | Done, but not available from text    |
|                    | 61  | M      | Korea   | reduced visual acuity | RE         | logMAR 0.04          | 2 days                                       | 1st  | AstraZeneca | Done, but not available from text        | Done, but not available from text     | unknown                                | Done, but not available from text    |

|                      |    |   |          |                                                                |    |                                 |         |       |             |                                                                                                                                                 |                                                                                                                                     |                                                |                                                                                                                                                                                                  |
|----------------------|----|---|----------|----------------------------------------------------------------|----|---------------------------------|---------|-------|-------------|-------------------------------------------------------------------------------------------------------------------------------------------------|-------------------------------------------------------------------------------------------------------------------------------------|------------------------------------------------|--------------------------------------------------------------------------------------------------------------------------------------------------------------------------------------------------|
|                      | 79 | M | Korea    | reduced visual acuity                                          | LE | logMAR0.04                      | 2 days  | 2nd   | Pfizer      | Done, but not available from text                                                                                                               | Done, but not available from text                                                                                                   | unknown                                        | Done, but not available from text                                                                                                                                                                |
|                      | 77 | F | Korea    | reduced visual acuity                                          | LE | logMAR 0.8                      | 16 days | 1st   | Pfizer      | Done, but not available from text                                                                                                               | Done, but not available from text                                                                                                   | unknown                                        | Done, but not available from text                                                                                                                                                                |
|                      | 63 | M | Korea    | reduced visual acuity                                          | RE | logMAR 0.01                     | 13 days | 1st   | Pfizer      | Done, but not available from text                                                                                                               | Done, but not available from text                                                                                                   | unknown                                        | Done, but not available from text                                                                                                                                                                |
|                      | 51 | F | Korea    | reduced visual acuity                                          | LE | logMAR 0.09                     | 21 days | 1st   | AstraZeneca | Done, but not available from text                                                                                                               | Done, but not available from text                                                                                                   | unknown                                        | Done, but not available from text                                                                                                                                                                |
|                      | 81 | F | Korea    | reduced visual acuity                                          | LE | logMAR 0.3                      | 4 days  | 1st   | Pfizer      | Done, but not available from text                                                                                                               | Done, but not available from text                                                                                                   | unknown                                        | Done, but not available from text                                                                                                                                                                |
|                      | 61 | M | Korea    | reduced visual acuity                                          | LE | logMAR 0.9                      | 3 days  | 1st   | AstraZeneca | Done, but not available from text                                                                                                               | Done, but not available from text                                                                                                   | unknown                                        | Done, but not available from text                                                                                                                                                                |
| Sacconi R et al [21] | 74 | F | Italy    | painless visual loss                                           | RE | 20/32                           | 2 days  | 2nd   | Moderna     | venous congestion, extensive blot haemorrhages in inferior quadrants                                                                            | occluded areas thickened                                                                                                            | not done                                       | not done                                                                                                                                                                                         |
|                      |    |   |          |                                                                | RE | declined to 20/40 at 3 week F/U | ditto   | ditto | ditto       | unknown                                                                                                                                         | week 3: CME with intraretinal fluid; week 5: macula edema extended, significant serous retinal detachment, intraretinal cysts       | not done                                       | week 5: delayed venous filling, masking effect from intraretinal haemorrhages and vascular leakage in inferior quadrants                                                                         |
| Ikegami Y et al [22] | 54 | F | Japan    | sudden painless visual loss                                    | RE | no light perception             | 2 days  | 2nd   | Moderna     | extensive flame-shaped haemorrhages in all quadrants, macula whitening, papilloedema, attenuated retinal arteries                               | hyper-reflectivity of inner retinal layers, severe thickening of inner retina and loss of organised layered structure of the retina | absence of foveal and perifoveal vascular flow | 1 month later: delayed perfusion filling, macula and peripheral retina non-perfused regions, leaky vessels present in all quadrants                                                              |
| Endo B et al [23]    | 52 | M | Columbia | sudden blurred vision, esp. nasal and superotemporal quadrants | LE | OU 20/20                        | 15 days | 1st   | BNT         | minimal dot haemorrhages in upper quadrants, dilated tortuous veins in 4 quadrants, disperse exudates [fellow eye: only changes in macular RPE] | no macular edema                                                                                                                    | unknown                                        | delayed fluorescence in arterial phase; early phase: hypofluorescence near the temporal and inferonasal branches (with blocking areas corresponding to haemorrhages in superior quadrants); late |

|                            |     |        |                      |                                             |            |                                        |                                              |         |             |                                                                               | phases: temporal branch occlusion given by the absence of venous filling and slight hyperfluorescence in the nasal and temporal portion of CNII |                                        |                                                  |
|----------------------------|-----|--------|----------------------|---------------------------------------------|------------|----------------------------------------|----------------------------------------------|---------|-------------|-------------------------------------------------------------------------------|-------------------------------------------------------------------------------------------------------------------------------------------------|----------------------------------------|--------------------------------------------------|
|                            |     |        |                      |                                             | LE         | 20/30 (LE) 11 days after symptom onset | /                                            | ditto   | ditto       | more spot haemorrhages seen                                                   | unknown                                                                                                                                         | unknown                                | unknown                                          |
| Paper                      | Age | Gender | Country              | Complaint                                   | Laterality | BCVA of affected eye                   | Interval between last dose and symptom onset | Dose    | Vaccine     | Fundal abnormalities of the affected eye                                      | OCT abnormalities of the affected eye                                                                                                           | OCTA abnormalities of the affected eye | FA abnormalities of the affected eye             |
| Bialasiewicz AA et al [24] | 50  | M      | Qatar                | retrobulbar pain, red eye, vision reduction | LE         | BCVA OU 1.0/0.5                        | 15 minutes                                   | 2nd     | BNT         | unknown                                                                       | CME, central retinal thickness: 515 $\mu$ m, mild papilledema, intraretinal cysts, subretinal fluid from a mid-peripheral superior leakage area | unknown                                | unknown                                          |
| Goyal M et al [25]         | 28  | M      | India                | visual deterioration                        | RE         | 6/9, N8                                | 11 days                                      | 2nd     | Sputnik V   | superior hemi-retinal vein occlusion with severe CME                          | severe macular edema with significant intraretinal and subretinal fluid                                                                         | unknown                                | unknown                                          |
| Da Silva LSC et al [26]    | 66  | F      | Brazil               | /                                           | /          | /                                      | 16 days                                      | unknown | AstraZeneca | superotemporal intraretinal haemorrhages, macular edema                       | large central cysts in the inner nuclear layer, smaller perifoveal cysts, subretinal fluids                                                     | unknown                                | unknown                                          |
|                            | 51  | M      | Spain                | /                                           | /          | /                                      | 6 days                                       | unknown | Pfizer      | diffuse intraretinal haemorrhages emerging from the optic disc, macular edema | large central cysts in the inner nuclear layer, smaller perifoveal cysts, subretinal fluids                                                     | unknown                                | unknown                                          |
|                            | 66  | M      | Brazil               | /                                           | /          | /                                      | 4 days                                       | unknown | AstraZeneca | /                                                                             | /                                                                                                                                               | /                                      | /                                                |
|                            | 54  | F      | Brazil               | /                                           | /          | /                                      | 10 days                                      | unknown | AstraZeneca | /                                                                             | /                                                                                                                                               | /                                      | /                                                |
|                            | 81  | F      | Germany/Switzerland? | blurred vision                              | RE         | RE: BCVA: 0.05 (decimal);              | 12 days                                      | 2nd     | Comirnaty   | multiple intraretinal haemorrhages,                                           | hyperreflectivity of inner retinal                                                                                                              | unknown                                | arterial capillary non-perfusion, delayed venous |



|                      |    |   |                  |         |    | LE: 0.25<br>(decimal)                              |        |       |             | intact macula<br>(RE); centrally<br>localised<br>haemorrhages,<br>hard exudates,<br>intraretinal<br>edema with<br>exudates in the<br>macula;<br>increased cup-<br>disc ratio (LE) | layers (RE);<br>CME (LE) |   | filling (RE);<br>vessel leakage<br>inferior to the<br>fovea (LE) |
|----------------------|----|---|------------------|---------|----|----------------------------------------------------|--------|-------|-------------|-----------------------------------------------------------------------------------------------------------------------------------------------------------------------------------|--------------------------|---|------------------------------------------------------------------|
| Choi M et al<br>[28] | 64 | M | Korea<br>(Asian) | unknown | RE | 20/25<br>(snellen)                                 | 1 day  | 1st   | AstraZeneca | tortuous vessels,<br>scattered blot<br>haemorrhage                                                                                                                                | /                        | / | /                                                                |
|                      | 33 | F | Korea<br>(Asian) | unknown | RE | 20/40<br>(snellen)                                 | 6 days | 2nd   | BNT         | /                                                                                                                                                                                 | /                        | / | /                                                                |
|                      | 48 | M | Korea<br>(Asian) | unknown | RE | 20/125<br>(snellen)                                | 6 days | 3rd   | BNT         | /                                                                                                                                                                                 | /                        | / | /                                                                |
|                      | 69 | F | Korea<br>(Asian) | unknown | LE | 20/20<br>(snellen)                                 | 3 days | 1st   | AstraZeneca | /                                                                                                                                                                                 | /                        | / | /                                                                |
|                      | 66 | M | Korea<br>(Asian) | unknown | LE | 20/20<br>(snellen)                                 | 7 days | 2nd   | AstraZeneca | /                                                                                                                                                                                 | /                        | / | /                                                                |
|                      | 68 | F | Korea<br>(Asian) | unknown | RE | hand motion                                        | 1 day  | 1st   | AstraZeneca | /                                                                                                                                                                                 | /                        | / | /                                                                |
|                      | 74 | F | Korea<br>(Asian) | unknown | RE | hand motion                                        | 6 days | 2nd   | AstraZeneca | /                                                                                                                                                                                 | /                        | / | /                                                                |
|                      |    |   | Korea<br>(Asian) | unknown | LE | hand motion<br>(VA same as<br>pre-<br>vaccination) | ditto  | ditto | ditto       | /                                                                                                                                                                                 | /                        | / | /                                                                |
|                      | 63 | F | Korea<br>(Asian) | unknown | LE | 20/630 (VA<br>same as pre-<br>vaccination)         | 3 days | 1st   | AstraZeneca | tortuous vessels<br>with macular<br>edema                                                                                                                                         | /                        | / | /                                                                |

| Paper                     | Age | Gender | Country | Complaint | Laterality | BCVA of<br>affected eye | Interval<br>between<br>last dose<br>and<br>symptom<br>onset | Dose            | Vaccine     | Fundal<br>abnormalities of<br>the affected eye                    | OCT<br>abnormalities of<br>the affected eye | OCTA<br>abnormalities of<br>the affected eye | FA<br>abnormalities of<br>the affected eye |
|---------------------------|-----|--------|---------|-----------|------------|-------------------------|-------------------------------------------------------------|-----------------|-------------|-------------------------------------------------------------------|---------------------------------------------|----------------------------------------------|--------------------------------------------|
| Vujosevic S<br>et al [29] | 69  | F      | Italy   | /         | RE         | 20/32                   | 1 week                                                      | 1st             | AstraZeneca | Haemorrhages<br>seen, quadrant<br>ischaemia                       | /                                           | /                                            | /                                          |
|                           | 82  | F      | Italy   | /         | RE         | 20/63                   | 2 weeks                                                     | 2 <sup>nd</sup> | BNT         | Severe edema,<br>haemorrhages<br>seen, quadrant<br>ischaemia      | /                                           | /                                            | /                                          |
|                           | 96  | F      | Italy   | /         | RE         | 20/200                  | 1 week                                                      | 2 <sup>nd</sup> | BNT         | Severe ischaemia<br>with subfoveal<br>neuroretinal<br>detachment, | /                                           | /                                            | /                                          |

|    |   |       |   |    |                     |           |                 |             |                                                                                         |   |   |   |
|----|---|-------|---|----|---------------------|-----------|-----------------|-------------|-----------------------------------------------------------------------------------------|---|---|---|
|    |   |       |   |    |                     |           |                 |             | haemorrhages<br>seen                                                                    |   |   |   |
| 91 | F | Italy | / | LE | Counting<br>finger  | 1.5 weeks | 2 <sup>nd</sup> | BNT         | Intraocular<br>inflammation,<br>severe edema and<br>haemorrhages                        | / | / | / |
| 78 | F | Italy | / | RE | 20/25               | 1 week    | 2 <sup>nd</sup> | BNT         | Mild edema and<br>haemorrhages<br>only                                                  | / | / | / |
| 78 | F | Italy | / | LE | 20/20               | 1 week    | 2 <sup>nd</sup> | BNT         | Only mild<br>haemorrhages                                                               | / | / | / |
| 70 | M | Italy |   | RE | 20/20               | 1 week    | 1 <sup>st</sup> | AstraZeneca | Severe<br>haemorrhages                                                                  | / | / | / |
| 40 | M | Italy | / | RE | 20/20               | 2 weeks   | 1 <sup>st</sup> | AstraZeneca | Mild<br>haemorrhages                                                                    | / | / | / |
| 91 | M | Italy | / | RE | 20/32               | 4 weeks   | 2 <sup>nd</sup> | BNT         | Severe ischaemia<br>with subfoveal<br>neuroretinal<br>detachment, no<br>haemorrhages    | / | / | / |
| 72 | F | Italy | / | RE | 20/25               | 3 weeks   | 2 <sup>nd</sup> | BNT         | Mild edema and<br>haemorrhages<br>with quadrant<br>ischaemia                            | / | / | / |
| 88 | M | Italy | / | RE | 20/125              | 2 weeks   | 2 <sup>nd</sup> | BNT         | Moderate edema<br>and mild<br>hemorrhages                                               | / | / | / |
| 73 | F | Italy | / | RE | Counting<br>fingers | 4 weeks   | 2 <sup>nd</sup> | AstraZeneca | Mild edema with<br>severe<br>haemorrhages                                               | / | / | / |
| 65 | F | Italy | / | RE | 20/40               | 1 week    | 1 <sup>st</sup> | Jcovden     | Mild edema,<br>small subfoveal<br>neuroretinal<br>detachment,<br>severe<br>haemorrhages | / | / | / |
| 72 | F | Italy | / | LE | 20/40               | 2 weeks   | 1 <sup>st</sup> | AstraZeneca | Severe<br>haemorrhage<br>with ischaemia in<br>superior<br>quadrants                     | / | / | / |

Table S2 – Patient’s clinical characteristics, treatment received and response to treatment

| Paper                              | Age | Gender | Country            | Past medical history                                                                                         | Past ocular history                                 | Laboratory abnormalities                                                                                                 | Diagnosis                                                    | Management                                                                                                                         | Response to treatment                                                                                                                                                                             |
|------------------------------------|-----|--------|--------------------|--------------------------------------------------------------------------------------------------------------|-----------------------------------------------------|--------------------------------------------------------------------------------------------------------------------------|--------------------------------------------------------------|------------------------------------------------------------------------------------------------------------------------------------|---------------------------------------------------------------------------------------------------------------------------------------------------------------------------------------------------|
| <b>Ruiz OA et al [1]</b>           | 51  | F      | Spanish            | hypothyroidism on levothyroxine                                                                              | unknown                                             | normal                                                                                                                   | CRVO, BRAO                                                   | Not mentioned                                                                                                                      | BCVA LE dropped to 3/10 at 1 month F/U; No further vascular occlusive episodes and BCVA remained stable at 2 month F/U                                                                            |
| <b>Parakh S et al [2]</b>          | 31  | M      | India              | unremarkable, suspected COVID infection shortly before first dose due to significantly high IgG (> 250 U/mL) | unknown                                             | mildly raised serum homocysteine (22.19 µmol/L)                                                                          | CRVO                                                         | Intravitreal anti-VEGF + folic acid, B6, B12                                                                                       | LE BCVA 6/6, DFE and OCTA abnormalities reduced at 8 month F/U, homocysteine level normalised at 11 month F/U                                                                                     |
| <b>Nangia P et al [3]</b>          | 13  | M      | India              | unremarkable                                                                                                 | unknown                                             | unremarkable                                                                                                             | CRVO                                                         | IV pulse methylprednisolone                                                                                                        | BCVA 6/6 after 3 doses of pulse steroid, complete resolution of retinal haemorrhage and disc edema                                                                                                |
| <b>Fernández-Vigo JI et al [4]</b> | 69  | F      | Spain              | unremarkable                                                                                                 | LE choroidal macular nevus                          | unknown                                                                                                                  | BRVO                                                         | None given                                                                                                                         | Fundal abnormalities resolved, fellow eye developed asymptomatic CRVO at 6 week F/U (after 15 days 2nd dose)                                                                                      |
|                                    |     |        |                    | ditto                                                                                                        | ditto                                               | unremarkable                                                                                                             | CRVO                                                         | Intravitreal dexamethasone implant with recurrence of macular edema at 4 months, retreated with intravitreal dexamethasone implant | RE BCVA: 20/150 due to macular atrophy, with complete resolution of macula edema at 2 month F/U - macular edema recurred at 4 month, retreat successfully with intravitreal dexamethasone implant |
| <b>Chen Y [5]</b>                  | 72  | M      | Taiwan             | unremarkable                                                                                                 | unknown                                             | normal, except raised d-dimer (547 ng/mL)                                                                                | CRAO + CRVO + exudative retinal detachment at posterior pole | intravitreal aflibercept + IV then oral methylprednisolone + pan-retinal photocoagulation                                          | RE BCVA: 20/400 at 1 month, OCT showed subsided retinal fluid (exudative retinal detachment) but a disorganised and atrophic retina at 1 month                                                    |
| <b>Karageorgiou G et al [6]</b>    | 60  | M      | Greece (Caucasian) | unremarkable, apart from obesity (BMI 29.3)                                                                  | unremarkable, NAD on routine checkup 3 months prior | unremarkable                                                                                                             | BRVO                                                         | intravitreal anti-VEGF                                                                                                             | unknown                                                                                                                                                                                           |
| <b>Takacs A et al [7]</b>          | 35  | M      | Hungary            | mild aortic insufficiency, smoker, mild hypertension (139/87 mmHg), lower limb varicose veins                | Unknown                                             | slightly reduced prothrombin time, slightly raised antithrombin activity, slightly elevated serum homocysteine, negative | Haemorrhagic CRVO                                            | ASA protect (100 mg daily) + single dose of intravitreal anti-VEGF for RE                                                          | RE VA 1.0 with macular edema completely resolved, retinal haemorrhage and papilloedema reduced                                                                                                    |

|                        |     |        |         |                                                                            |                                     |                                                                                                                                                                                                                                          | for anti-heparin/PF4 complex (antibody measured 2.5 months after first presentation) |                                                                                                                                                                                                                                                  |                                                                                                                                                           |
|------------------------|-----|--------|---------|----------------------------------------------------------------------------|-------------------------------------|------------------------------------------------------------------------------------------------------------------------------------------------------------------------------------------------------------------------------------------|--------------------------------------------------------------------------------------|--------------------------------------------------------------------------------------------------------------------------------------------------------------------------------------------------------------------------------------------------|-----------------------------------------------------------------------------------------------------------------------------------------------------------|
| Sodhi PK et al [8]     | 43  | M      | India   | unremarkable                                                               | unknown                             | unremarkable, except mildly raised HbA1c (6.7%), no risk factors for CRVO, routine blood test grossly normal                                                                                                                             | CRVO                                                                                 | Intravitreal injection of triamcinolone acetonide                                                                                                                                                                                                | LE BCVA 20/200 and laser performed for NVE and ischaemic areas at 6 month F/U (DFE: haemorrhages and exudates resolved, central foveal thickness: 320 µm) |
| Paper                  | Age | Gender | Country | Past medical history                                                       | Past ocular history                 | Laboratory abnormalities                                                                                                                                                                                                                 | Diagnosis                                                                            | Management                                                                                                                                                                                                                                       | Response to treatment                                                                                                                                     |
| Tanaka H et al [9]     | 50  | F      | Japan   | hypertension in clinic (147/87 mmHg, breast cancer on tamoxifen            | unknown                             | unknown                                                                                                                                                                                                                                  | BRVO with secondary macular edema                                                    | intravitreal ranibizumab                                                                                                                                                                                                                         | macular edema resolved and BCVA back to 20/20, no recurrence at 2 month                                                                                   |
|                        | 56  | F      | Japan   | unremarkable                                                               | unknown                             | unknown                                                                                                                                                                                                                                  | BRVO with secondary macular edema                                                    | intravitreal ranibizumab                                                                                                                                                                                                                         | macular edema resolved and BCVA back to 20/20, no recurrence at 2 month                                                                                   |
| Romano D et al [10]    | 54  | F      | Italy   | arterial hypertension, well-controlled by drugs                            | unknown                             | unremarkable                                                                                                                                                                                                                             | Ischaemic CRVO                                                                       | 0.7 mg dexamethasone intravitreal implant, laser panretinal photocoagulation                                                                                                                                                                     | BCVA 20/200 on follow-up and macular edema improved                                                                                                       |
| Majumder PD et al [11] | 28  | M      | India   | unremarkable                                                               | unknown                             | unremarkable                                                                                                                                                                                                                             | ischaemic CRVO                                                                       | IV pulse steroid (methylprednisolone), followed by oral steroid (intravitreal anti-VEGF/steroid deferred due to good CME reduction with pulse steroid and the concern regarding sub-foveal migration of hard exudates with sudden CME reduction) | BCVA: 6/9 and most fundal abnormalities resolved at 1 month                                                                                               |
| Priluck AZ et al [12]  | 57  | F      | USA     | hypertension, drug history: fluticasone, hydrochlorothiazide, fexofenadine | dry eye disease on artificial tears | unknown                                                                                                                                                                                                                                  | superotemporal BRVO                                                                  | initially offer just observation due to lack of macular edema; 2 months later, intravitreal anti-VEGF given due to drop in vision during conservative treatment                                                                                  | latest BCVA 20/25, OCT showed persistent foveal-sparing macular edema                                                                                     |
| Sugihara K et al [13]  | 38  | M      | Japan   | unremarkable                                                               | unknown                             | unremarkable (platelet $256 \times 10^3/\mu\text{L}$ , d-dimer $< 0.5 \mu\text{g/mL}$ , protein C 147%, protein S 124%, anticardiolipin- $\beta 2$ -glycoprotein I complex antibody $< 0.7 \text{ U/mL}$ , anticardiolipin IgG 8.1 U/mL) | BRVO with macula edema                                                               | Intravitreal anti-VEGF                                                                                                                                                                                                                           | LE BCVA: 1.2 since 2 month post-treatment; 7 months post-treatment, fundal abnormalities resolved                                                         |

|                             |    |   |           |                                |                                                                                                              |              |                                  |                        |                                                                                                                                                                                     |
|-----------------------------|----|---|-----------|--------------------------------|--------------------------------------------------------------------------------------------------------------|--------------|----------------------------------|------------------------|-------------------------------------------------------------------------------------------------------------------------------------------------------------------------------------|
| <b>Pur DR et al [14]</b>    | 34 | M | Canada    | unremarkable                   | laser correction for mild myopia 2 years ago                                                                 | unremarkable | BRVO                             | unknown                | at 4 month and 7 month F/U: intraretinal haemorrhages resolved with emergence of new macular exudate; at 10 month F/U - BCVA RE: 20/20 with persistent inferior visual field defect |
| <b>Peters MC et al [15]</b> | 71 | M | Australia | unremarkable                   | unremarkable                                                                                                 | unknown      | inferior macula BRVO + CME       | Intravitreal anti-VEGF | unknown                                                                                                                                                                             |
|                             | 58 | M | Australia | unremarkable                   | ipsilateral pterygium excision                                                                               | unknown      | hemiretinal RVO + CME            | Intravitreal anti-VEGF | unknown                                                                                                                                                                             |
|                             | 73 | F | Australia | hypertension                   | Fellow eye macula-off rhegmatogenous retinal detachment + macula hole; OU posterior chamber intraocular lens | unknown      | inferotemporal BRVO + CME        | Intravitreal anti-VEGF | unknown                                                                                                                                                                             |
|                             | 47 | F | Australia | hyperthyroidism on carbimazole | unremarkable                                                                                                 | unknown      | superotemporal macula BRVO + CME | Intravitreal anti-VEGF | unknown                                                                                                                                                                             |
|                             | 36 | M | Australia | unremarkable                   | unremarkable                                                                                                 | unknown      | Non-ischaemic CRVO + CME         | Intravitreal anti-VEGF | unknown                                                                                                                                                                             |

| Paper                         | Age | Gender | Country         | Past medical history                                                                           | Past ocular history | Laboratory abnormalities                                                       | Diagnosis                                                 | Management                                                                                                                                                                                                                                                                                                                           | Response to treatment                                                                                                                                                                                     |
|-------------------------------|-----|--------|-----------------|------------------------------------------------------------------------------------------------|---------------------|--------------------------------------------------------------------------------|-----------------------------------------------------------|--------------------------------------------------------------------------------------------------------------------------------------------------------------------------------------------------------------------------------------------------------------------------------------------------------------------------------------|-----------------------------------------------------------------------------------------------------------------------------------------------------------------------------------------------------------|
| <b>Lee S et al [16]</b>       | 34  | M      | (Caucasian)     | unknown                                                                                        | unknown             | raised total cholesterol (227), LDL (159), mildly raised ESR (26) [normal CRP] | CRVO + CRAO which evolves into ischaemia optic neuropathy | hyperbaric oxygen; intravitreal aflibercept + (topical) dexamethasone, bromfenac, acetazolamide, trial LMWH – no clinical improvement; high-dose IV methylprednisolone (due to possible NAION) + pentoxifylline + apixaban – BCVA improved to 20/30 3 weeks after first presentation (with arterial and venous circulation restored) | No response to other treatments but BCVA improved to 20/30 after a combination of higher-dose IV methylprednisolone, pentoxifylline and apixaban (with residual inferior altitudinal visual field defect) |
| <b>Shah PP et al [17]</b>     | 27  | F      | USA (Caucasian) | PCOS (was on OCP 7 weeks prior to presentation), idiopathic intracranial hypertension, anaemia | unknown             | unremarkable                                                                   | incipient CRVO                                            | Observe                                                                                                                                                                                                                                                                                                                              | /                                                                                                                                                                                                         |
|                               |     |        |                 | ditto                                                                                          | unknown             | unknown                                                                        | CRVO                                                      | intravitreal anti-VEGF                                                                                                                                                                                                                                                                                                               | significant improvement in vision and abnormalities on examination in 2 weeks                                                                                                                             |
| <b>Sonawane NJ et al [18]</b> | 50  | M      | India           | poorly controlled DM                                                                           | unknown             | HbA1c: 13.2%, deranged renal function test                                     | CRVO                                                      | intravitreal anti-VEGF                                                                                                                                                                                                                                                                                                               | unknown                                                                                                                                                                                                   |
|                               | 43  | F      | India           | unknown                                                                                        | unknown             | raised ESR, CRP, rheumatoid factor, d-dimer                                    | impending CRVO                                            | close F/U                                                                                                                                                                                                                                                                                                                            | unknown                                                                                                                                                                                                   |

|                     |    |   |       |         |                                                                                                                                                                               |         |                                                     |                        |                                                                        |
|---------------------|----|---|-------|---------|-------------------------------------------------------------------------------------------------------------------------------------------------------------------------------|---------|-----------------------------------------------------|------------------------|------------------------------------------------------------------------|
| Tanaka H et al [19] | 71 | F | Japan | unknown | LE: inferior temporal BRVO (approx. 3.5 years ago) with secondary macular edema of LE, treated with intravitreal anti-VEGF and pathologies resolved with no recurrence on F/U | unknown | superior temporal BRVO and secondary macular edema  | intravitreal anti-VEGF | BCVA back to 20/20, macular edema resolved                             |
|                     | 74 | M | Japan | unknown | RE: superior temporal BRVO without macular edema (around 1.5 years ago), followed up without treatment                                                                        | unknown | superior temporal BRVO with secondary macular edema | intravitreal anti-VEGF | BCVA still 20/25, no symptom or recurrence detected after his 2nd dose |

| Paper              | Age | Gender | Country | Past medical history                                                  | Past ocular history                                          | Laboratory abnormalities        | Diagnosis | Management | Response to treatment |
|--------------------|-----|--------|---------|-----------------------------------------------------------------------|--------------------------------------------------------------|---------------------------------|-----------|------------|-----------------------|
| Park HS et al [20] | 68  | F      | Korea   | dyslipidaemia                                                         | vitrectomy for vitreous haemorrhage, cataract surgery        | not done                        | RVO       | Observe    | unknown               |
|                    | 76  | M      | Korea   | hypertension                                                          | normal-tension glaucoma, cataract surgery                    | unremarkable                    | RVO       | Observe    | unknown               |
|                    | 85  | F      | Korea   | DM, hypertension, old tuberculosis, dementia, end-stage renal disease | vitrectomy with cataract surgery for vitreous haemorrhage    | not done                        | RVO       | anti-VEGF  | unknown               |
|                    | 59  | M      | Korea   | DM, hypertension                                                      | vitrectomy with secondary IOL, scleral fixation              | unremarkable                    | RVO       | Observe    | unknown               |
|                    | 61  | M      | Korea   | unremarkable                                                          | unremarkable                                                 | unremarkable                    | RVO       | anti-VEGF  | unknown               |
|                    | 79  | M      | Korea   | DM, early gastric cancer                                              | unremarkable                                                 | unremarkable                    | RVO       | anti-VEGF  | unknown               |
|                    | 77  | F      | Korea   | hypertension, chronic hepatitis B, colon cancer                       | cataract surgery                                             | Not done                        | RVO       | anti-VEGF  | unknown               |
|                    | 63  | M      | Korea   | DM                                                                    | diabetic macular edema, intravitreal triamcinolone injection | low haemoglobin and haematocrit | RVO       | anti-VEGF  | unknown               |
|                    | 51  | F      | Korea   | hypertension                                                          | unremarkable                                                 | not done                        | RVO       | anti-VEGF  | unknown               |
|                    | 81  | F      | Korea   | hypertension                                                          | cataract surgery                                             | not done                        | RVO       | Observe    | unknown               |
|                    | 61  | M      | Korea   | hypertension                                                          | uveitis                                                      | not done                        | RVO       | Observe    | unknown               |

| <b>Sacconi R et al [21]</b>       | 74  | F      | Italy                    | breast cancer in complete remission, atrial fibrillation on drugs with alleged good drug compliance | unknown                     | not done                                                                         | hemispheric RVO                               | None given as patient is already on anticoagulants for AF                                  | /                                                                                                 |
|-----------------------------------|-----|--------|--------------------------|-----------------------------------------------------------------------------------------------------|-----------------------------|----------------------------------------------------------------------------------|-----------------------------------------------|--------------------------------------------------------------------------------------------|---------------------------------------------------------------------------------------------------|
|                                   |     |        |                          | ditto                                                                                               | ditto                       | week 5: platelet $144 \times 10^9/L$ (mildly reduced)                            | ditto                                         | Intravitreal anti-VEGF only at week 5                                                      | BCVA improved to 20/32 and macula edema resolves                                                  |
| <b>Ikegami Y et al [22]</b>       | 54  | F      | Japan                    | hypothyroidism                                                                                      | unknown                     | slightly reduced platelet ( $129 \times 10^9/L$ )                                | CRVO + CRAO                                   | Unknown                                                                                    | unknown                                                                                           |
| <b>Endo B et al [23]</b>          | 52  | M      | Columbia                 | unknown                                                                                             | unknown                     | unremarkable                                                                     | non-ischaemic CRVO                            | first given intravitreal dexamethasone                                                     | fundus abnormalities improved after 6 days                                                        |
|                                   |     |        |                          | unknown                                                                                             | unknown                     | ditto                                                                            | ditto                                         | intravitreal anti-VEGF and oral apixaban given due to worsened BCVA and fundal pathologies | BCVA improved to 20/20 and intraretinal haemorrhages reduced after medications                    |
| Paper                             | Age | Gender | Country                  | Past medical history                                                                                | Past ocular history         | Laboratory abnormalities                                                         | Diagnosis                                     | Management                                                                                 | Response to treatment                                                                             |
| <b>Bialasiewicz AA et al [24]</b> | 50  | M      | Qatar                    | atopic dermatitis on topicals                                                                       | unknown                     | unremarkable                                                                     | CRVO (haemorrhagic CRVO with ischaemic areas) | low-dose acetylsalicylic acid + monthly intravitreal anti-VEGF injections                  | BSCVA: 1.0/1.0 + reduction of macular edema (CRT: 319my) 3 days after treatment                   |
| <b>Goyal M et al [25]</b>         | 28  | M      | India                    | unremarkable ("healthy")                                                                            | unknown                     | unremarkable, except markedly raised COVID-19 IgG                                | HRVO                                          | oral prednisolone in tapering dose and apixaban for 6 weeks                                | 3 days later: BCVA improved to 6/6, N6; marked improvement on OCT and DFE 10 days after treatment |
| <b>Da Silva LSC et al [26]</b>    | 66  | F      | Brazil                   | Raised Apo-A, increased BMI, hysterectomy 4 months ago for endometrial hypertrophy                  | unknown                     | unknown                                                                          | BRVO                                          | unknown                                                                                    | unknown                                                                                           |
|                                   | 51  | M      | Spain                    | unknown                                                                                             | unknown                     | unknown                                                                          | CRVO                                          | unknown                                                                                    | unknown                                                                                           |
|                                   | 66  | M      | Brazil                   | Hypertension                                                                                        | /                           | /                                                                                | RVO                                           | unknown                                                                                    | unknown                                                                                           |
|                                   | 54  | F      | Brazil                   | /                                                                                                   | /                           | /                                                                                | RVO                                           | unknown                                                                                    | unknown                                                                                           |
| <b>Girbardt C et al [27]</b>      | 81  | F      | Germany/<br>Switzerland? | Hypertension on drug, under good control                                                            | primary open angle glaucoma | Neurological work-up unremarkable, CTA rule out cerebral sinus venous thrombosis | RAO+RVO (RE); BRVO (LE)                       | intravitreal anti-VEGF for LE                                                              | unknown                                                                                           |
| <b>Choi M et al [28]</b>          | 64  | M      | Korea (Asian)            | unremarkable                                                                                        | unremarkable                | unknown                                                                          | CRVO                                          | observation with aspirin                                                                   | unknown                                                                                           |
|                                   | 33  | F      | Korea (Asian)            | unremarkable                                                                                        | unremarkable                | unknown                                                                          | CRVO                                          | intravitreal anti-VEGF                                                                     | unknown                                                                                           |
|                                   | 48  | M      | Korea (Asian)            | unremarkable                                                                                        | unremarkable                | unknown                                                                          | CRVO                                          | intravitreal anti-VEGF                                                                     | unknown                                                                                           |
|                                   | 69  | F      | Korea (Asian)            | unremarkable                                                                                        | unremarkable                | unknown                                                                          | BRVO                                          | observation with aspirin                                                                   | unknown                                                                                           |
|                                   | 66  | M      | Korea (Asian)            | unremarkable                                                                                        | unremarkable                | unknown                                                                          | BRVO                                          | observation                                                                                | unknown                                                                                           |
|                                   | 68  | F      | Korea (Asian)            | unremarkable, on aspirin for unknown reason                                                         | BRVO (2020)                 | unknown                                                                          | BRVO with vitreous haemorrhage                | observation                                                                                | unknown                                                                                           |
|                                   | 74  | F      | Korea (Asian)            | hypertension, nasal cavity cancer in complete remission, on aspirin for unknown reason              | BRVO (2020)                 | unknown                                                                          | BRVO with vitreous haemorrhage                | intravitreal anti-VEGF followed by vitrectomy as the vitreous haemorrhage did not resolve  | unknown                                                                                           |

|  |    |   |               |   |             |   |                                |                                                                                           |         |
|--|----|---|---------------|---|-------------|---|--------------------------------|-------------------------------------------------------------------------------------------|---------|
|  |    |   | Korea (Asian) | / | /           | / | BRVO with vitreous haemorrhage | intravitreal anti-VEGF followed by vitrectomy as the vitreous haemorrhage did not resolve | unknown |
|  | 63 | F | Korea (Asian) | / | CRVO (2021) |   | CRVO decompensation            | intravitreal anti-VEGF                                                                    | unknown |

  

| Paper                  | Age | Gender | Country | Past medical history                                                                     | Past ocular history | Laboratory abnormalities | Diagnosis           | Management                | Response to treatment         |
|------------------------|-----|--------|---------|------------------------------------------------------------------------------------------|---------------------|--------------------------|---------------------|---------------------------|-------------------------------|
| Vujosevic S et al [29] | 69  | F      | Italy   | DVT                                                                                      | /                   | /                        | Inferotemporal BRVO | Laser photocoagulation    | Latest BCVA: 20/20            |
|                        | 82  | F      | Italy   | Unremarkable                                                                             | /                   | /                        | Inferotemporal BRVO | Steroid                   | Latest BCVA: 20/40            |
|                        | 96  | F      | Italy   | Hypertension, DM                                                                         | /                   | /                        | CRVO                | Steroid                   | Latest BCVA: 20/200           |
|                        | 91  | F      | Italy   | unremarkable                                                                             | /                   | /                        | CRVO                | Patient refused treatment | Latest BCVA: Counting finger  |
|                        | 78  | F      | Italy   | unremarkable                                                                             | /                   | /                        | Superotemporal BRVO | Anti-VEGF                 | Latest BCVA: 20/20            |
|                        | 78  | F      | Italy   | unremarkable                                                                             | /                   | /                        | Superotemporal BRVO | None                      | Latest BCVA: 20/20            |
|                        | 70  | M      | Italy   | unremarkable                                                                             | /                   | /                        | CRVO                | None                      | Latest BCVA: 20/20            |
|                        | 40  | M      | Italy   | Hyperhomocysteinaemia                                                                    | /                   | /                        | BRVO                | None                      | Latest BCVA: 20/20            |
|                        | 91  | M      | Italy   | DM                                                                                       |                     |                          | BRVO                | Steroid                   | Latest BCVA: 20/32            |
|                        | 72  | F      | Italy   | Hypertension, hyperlipidemia                                                             | /                   | /                        | Superotemporal BRVO | Steroid                   | Latest BCVA: 20/20            |
|                        | 88  | M      | Italy   | Hypertension, hyperlipidaemia, cardiovascular disease, Alzheimer's disease, "K prostate" | /                   | /                        | HRVO                | Steroid                   | Latest BCVA: 20/125           |
|                        | 73  | F      | Italy   | Hypertension, hyperlipidaemia, cardiovascular disease, neuroendocrine tumour             | /                   | /                        | CRVO                | Steroid                   | Latest BCVA: Counting fingers |
|                        | 65  | F      | Italy   | Hypertension, hyperlipidaemia, DM                                                        | /                   | /                        | CRVO                | Steroid                   | Latest BCVA: 20/32            |
|                        | 72  | F      | Italy   | Hypertension, cardiovascular disease                                                     | /                   | /                        | HRVO                | Steroid                   | Latest BCVA: 20/50            |

Abbreviations: AV nicking: arteriovenous nicking, Apo-A: apolipoprotein-A, BCVA: best-corrected visual acuity, BMI: body mass index, BRVO: branch retinal vein occlusion, CME: cystoid macular edema, CN: cranial nerve, CRP: C-reactive protein, CRVO: central retinal vein occlusion, CTA: Computed tomography angiogram, DFE: dilated fundal examination, DM: diabetes mellitus, DVT: deep vein thrombosis, ESR: erythrocyte sedimentation rate, F: female, FA: fluorescein angiogram, F/U: follow-up, HRVO: hemiretinal vein occlusion, IgG: immunoglobulin-G, IOP: intraocular pressure, IV: intravenous, LDL: low-density lipoprotein, LE: left eye, M: male, NAD: no abnormalities detected, NAION: non-arterial ischaemic optic neuropathy, OCT: optical coherence tomography, OCTA: optical coherence tomography angiography, OCP: oral contraceptive pills, PCOS: polycystic ovarian syndrome, RE: right eye, RNFL: retinal nerve fibre layer, RPE: retinal pigmented epithelium, VEGF: vascular endothelial growth factor



## References

1. Ruiz, O.A.G. and J.J. González-López, *Simultaneous unilateral central retinal vein occlusion and branch retinal artery occlusion after Coronavirus Disease 2019 (COVID-19) mRNA vaccine*. Arquivos Brasileiros de Oftalmologia, 2022.
2. Parakh, S., et al., *Central Retinal Vein Occlusion Post ChAdOx1 nCoV-19 Vaccination—Can It Be Explained by the Two-hit Hypothesis?* 2022.
3. Nangia, P., V.J. Prakash, and P.D. Majumder, *Retinal venous occlusion in a child following Corbevax COVID-19 vaccination*. Indian Journal of Ophthalmology, 2022. **70**(10): p. 3713-3715.
4. Fernández-Vigo, J.I., et al., *Bilateral retinal vein occlusion after two doses of SARS-CoV-2 adenovirus vector-based vaccine*. Journal Français d'Ophtalmologie, 2022. **45**(9): p. e397-e399.
5. Chen, Y.C., *Combined central retinal artery occlusion and vein occlusion with exudative retinal detachment following COVID-19 vaccination*. The Kaohsiung Journal of Medical Sciences, 2022.
6. Karageorgiou, G., et al., *Branch retinal vein occlusion following ChAdOx1 nCoV-19 (Oxford-AstraZeneca) vaccine*. European Journal of Ophthalmology, 2022: p. 11206721221124651.
7. Takacs, A., M. Ecsedy, and Z.Z. Nagy, *Possible COVID-19 mRNA Vaccine-Induced Case of Unilateral Central Retinal Vein Occlusion*. Ocular Immunology and Inflammation, 2022: p. 1-6.
8. Sodhi, P.K., et al., *Central Retinal Vein Occlusion Following the First Dose of COVID Vaccine*. Cureus, 2022. **14**(6).
9. Tanaka, H., et al., *Branch retinal vein occlusion post severe acute respiratory syndrome coronavirus 2 vaccination*. Taiwan Journal of Ophthalmology, 2022. **12**(2): p. 202.
10. Romano, D., et al., *COVID-19 Adenoviral/Vector Vaccine and Central Retinal Vein Occlusion*. Ocular Immunology and Inflammation, 2022: p. 1-3.
11. Majumder, P.D. and V.J. Prakash, *Retinal venous occlusion following COVID-19 vaccination: Report of a case after third dose and review of the literature*. Indian Journal of Ophthalmology, 2022. **70**(6): p. 2191.
12. Priluck, A.Z., J.F. Arevalo, and R.R. Pandit, *Ischemic retinal events after COVID-19 vaccination*. American Journal of Ophthalmology Case Reports, 2022. **26**: p. 101540.
13. Sugihara, K., M. Kono, and M. Tanito, *Branch retinal vein occlusion after messenger RNA-Based COVID-19 vaccine*. Case Reports in Ophthalmology, 2022. **13**: p. 28-32.
14. Pur, D.R., L.L.C.D. Burszty, and Y. Iordanous, *Branch retinal vein occlusion in a healthy young man following mRNA COVID-19 vaccination*. American Journal of Ophthalmology Case Reports, 2022. **26**: p. 101445.
15. Peters, M.C., et al., *Retinal vein occlusion following COVID-19 vaccination*. Clinical & Experimental Ophthalmology, 2022.
16. Lee, S.S., Kamalesh K; Bose, Swaraj; Gallemore, Ron P, *Combined central retinal artery and vein occlusion with ischemic optic neuropathy after COVID-19 vaccination*. International Medical Case Reports Journal, 2022. **15**: p. 7.
17. Shah, P.P., et al., *Central retinal vein occlusion following BNT162b2 (Pfizer-BioNTech) COVID-19 messenger RNA vaccine*. Retinal Cases and Brief Reports, 2022.
18. Sonawane, N.J., et al., *Central retinal vein occlusion post-COVID-19 vaccination*. Indian journal of ophthalmology, 2022. **70**(1): p. 308.
19. Tanaka, H., et al., *Exacerbation of branch retinal vein occlusion post SARS-CoV2 vaccination*. Medicine, 2021. **100**(50).

20. Park, H.S., et al., *Retinal hemorrhage after SARS-CoV-2 vaccination*. Journal of Clinical Medicine, 2021. **10**(23): p. 5705.
21. Sacconi, R., et al., *Retinal vein occlusion following two doses of mRNA-1237 (moderna) immunization for SARS-cov-2: a case report*. Ophthalmology and Therapy, 2022. **11**(1): p. 453-458.
22. Ikegami, Y., et al., *Combined central retinal artery and vein occlusion shortly after mRNA-SARS-CoV-2 vaccination*. QJM: An International Journal of Medicine, 2021. **114**(12): p. 884-885.
23. Endo, B., S. Bahamon, and D.F. Martínez-Pulgarín, *Central retinal vein occlusion after mRNA SARS-CoV-2 vaccination: A case report*. Indian journal of ophthalmology, 2021. **69**(10): p. 2865.
24. Bialasiewicz, A., M. Farah-Diab, and H. Mebarki, *Central retinal vein occlusion occurring immediately after 2nd dose of mRNA SARS-CoV-2 vaccine*. International Ophthalmology, 2021. **41**(12): p. 3889-3892.
25. Goyal, M., S.I. Murthy, and Y. Srinivas, *Unilateral retinal vein occlusion in a young, healthy male following Sputnik V vaccination*. Indian journal of ophthalmology, 2021. **69**(12): p. 3793.
26. Da Silva, L.S., et al., *Vascular retinal findings after COVID-19 vaccination in 11 cases: a coincidence or consequence?* Arquivos Brasileiros de Oftalmologia, 2022. **85**: p. 158-165.
27. Girbardt, C., et al., *Retinal vascular events after mRNA and adenoviral-vectored COVID-19 vaccines—A case series*. Vaccines, 2021. **9**(11): p. 1349.
28. Choi, M., et al., *Vision-Threatening Ocular Adverse Events after Vaccination against Coronavirus Disease 2019*. Journal of Clinical Medicine, 2022. **11**(12): p. 3318.
29. Vujosevic, S., et al., *Retinal vascular occlusion and SARS-CoV-2 vaccination*. Graefes Archive for Clinical and Experimental Ophthalmology, 2022: p. 1-10.
